# Supplementary material
Source: PubMed Central journal article supplement (PMC5358495)
Supplement: jciinsight-2-91917-s001.pdf [file jciinsight-2-91917-s001.pdf]

**Supplementary Table 1.** Characteristics of Japanese CD patients who received prophylaxis.

|                                            | <b>Type I Paneth cell phenotype</b> | <b>Type II Paneth cell phenotype</b> | <b><i>P</i> value</b> |
|--------------------------------------------|-------------------------------------|--------------------------------------|-----------------------|
| N                                          | 24                                  | 52                                   |                       |
| Sex (male)                                 | 18/24 (75.0%)                       | 38/52 (73.1%)                        | 1.000                 |
| Mean disease duration (years)              | 17.0 (13.7-20.3)                    | 17.1 (14.8-19.3)                     | 0.962                 |
| Mean age at onset                          | 23.2 (20.7-25.6)                    | 23.1 (21.4-24.7)                     | 0.941                 |
| <b>Disease Onset</b>                       |                                     |                                      |                       |
| A1                                         | 4/24 (16.7%)                        | 9/52 (17.3%)                         | 1.000                 |
| A2                                         | 20/24 (83.3%)                       | 43/52 (82.7%)                        | 1.000                 |
| A3                                         | 0                                   | 0                                    | NA                    |
| <b>Disease Location</b>                    |                                     |                                      |                       |
| L1                                         | 3/24 (12.5%)                        | 6/52 (11.5%)                         | 1.000                 |
| L2                                         | 0                                   | 0                                    | NA                    |
| L3                                         | 21/24 (87.5%)                       | 46/52 (88.5%)                        | 1.000                 |
| <b>Disease Behavior</b>                    |                                     |                                      |                       |
| B1                                         | 0                                   | 0                                    | NA                    |
| B2                                         | 21/24 (87.5%)                       | 50/52 (96.2%)                        | 0.318                 |
| B3                                         | 14/24 (58.3%)                       | 21/52 (40.4%)                        | 0.216                 |
| Perianal disease                           | 19/24 (79.2%)                       | 40/52 (78.4%)                        | 1.000                 |
| Current smoking                            | 6/18 (33.3%)                        | 11/37 (29.7%)                        | 1.000                 |
| Previous resection                         | 15/24 (62.5%)                       | 37/52 (71.2%)                        | 0.596                 |
| <b>Treatment received prior to surgery</b> |                                     |                                      |                       |
| Biologics (Bio)                            | 9/24 (37.5%)                        | 19/52 (36.5%)                        | 1.000                 |
| Immunomodulator (IM)                       | 5/24 (20.8%)                        | 5/52 (9.6%)                          | 0.272                 |
| Elemental diet (ED)                        | 9/24 (37.5%)                        | 15/52 (28.9%)                        | 0.596                 |
| <b>Pre-surgery treatment combination</b>   |                                     |                                      |                       |
| Only Bio                                   | 3/24 (12.5%)                        | 11/52 (21.2%)                        | 0.528                 |
| Only IM                                    | 0                                   | 0                                    | NA                    |
| Only ED                                    | 4/24 (16.7%)                        | 11/52 (21.2%)                        | 0.763                 |
| Bio+IM                                     | 1/24 (4.2%)                         | 4/52 (7.7%)                          | 1.000                 |
| Bio+ED                                     | 1/24 (4.2%)                         | 3/52 (5.8%)                          | 1.000                 |
| ED+IM                                      | 0                                   | 0                                    | NA                    |
| Bio+IM+ED                                  | 4/24 (16.7%)                        | 1/52 (1.3%)                          | 0.036                 |
| <b>Postoperative therapy</b>               |                                     |                                      |                       |
| Bio                                        | 16/24 (66.7%)                       | 35/52 (67.3%)                        | 1.000                 |
| First use of Bio                           | 10/24 (41.7%)                       | 20/52 (38.5%)                        | 0.806                 |
| IM                                         | 6/24 (25.0%)                        | 12/52 (23.1%)                        | 1.000                 |
| ED                                         | 13 /24(54.2%)                       | 26/52 (50.0%)                        | 0.808                 |
| <b>Postoperative treatment combination</b> |                                     |                                      |                       |
| Only Bio                                   | 9/24 (37.5%)                        | 17/52 (32.7%)                        | 0.796                 |
| Only IM                                    | 1/24 (4.2%)                         | 2/52 (3.9%)                          | 1.000                 |

|           |              |               |       |
|-----------|--------------|---------------|-------|
| Only ED   | 5/24 (20.8%) | 14/52 (26.9%) | 0.777 |
| Bio+IM    | 1/24 (4.2%)  | 7/52 (13.5%)  | 0.423 |
| Bio+ED    | 4/24 (16.7%) | 9/52 (17.3%)  | 1.000 |
| ED+IM     | 2/24 (8.3%)  | 1/52 (1.9%)   | 0.233 |
| Bio+IM+ED | 2/24 (8.3%)  | 2/52 (3.9%)   | 0.587 |

Bio: biologics (infliximab or adalimumab), IM: immunomodulator, ED: elemental diet, PC: Paneth cell

**Supplementary Table 2.** Univariate and multivariate association analyses of recurrence after surgery in Japanese CD cohort. Biologics includes infliximab and adalimumab.

|                                     | N           | Univariate     |                 | Multivariate   |                 |
|-------------------------------------|-------------|----------------|-----------------|----------------|-----------------|
|                                     |             | <i>P</i> value | hazard ratio    | <i>P</i> value | hazard ratio    |
| <b>Disease Onset</b>                |             |                |                 |                |                 |
| <b>A1</b>                           | 13/76 (17%) | 0.893          |                 |                |                 |
| <b>A2</b>                           | 63/76 (83%) | 0.893          |                 |                |                 |
| <b>A3</b>                           | 0           | NA             |                 |                |                 |
| <b>Disease Location</b>             |             |                |                 |                |                 |
| <b>L1</b>                           | 9/76 (12%)  | 0.173          |                 |                |                 |
| <b>L2</b>                           | 0           | NA             |                 |                |                 |
| <b>L3</b>                           | 67/76 (88%) | 0.173          |                 |                |                 |
| <b>Disease Behavior</b>             |             |                |                 |                |                 |
| <b>B1</b>                           | 0           | NA             |                 |                |                 |
| <b>B2</b>                           | 71/76 (93%) | 0.463          |                 |                |                 |
| <b>B3</b>                           | 35/76 (46%) | 0.611          |                 |                |                 |
| <b>Perianal disease</b>             | 59/76 (78%) | 0.398          |                 |                |                 |
| <b>Current smoker</b>               | 17/55 (31%) | 0.047          | 1.94(0.91-2.14) |                |                 |
| <b>Previous resection</b>           | 52/76 (68%) | 0.600          | 1.22(0.61-2.45) |                |                 |
| <b>Postoperative therapy</b>        |             |                |                 |                |                 |
| <b>Elemental diet (ED)</b>          | 39/76 (51%) | 0.318          |                 |                |                 |
| <b>Immunomodulator (IM)</b>         | 18/76 (24%) | 0.043          | 1.91(0.88-4.12) | 0.108          |                 |
| <b>Biologics (Bio)</b>              | 51/76 (67%) | 0.463          |                 |                |                 |
| <b>Bio+IM</b>                       | 12/76 (16%) | 0.273          |                 |                |                 |
| <b>First use of bio</b>             | 30/76 (39%) | 0.071          | 0.55(0.30-1.02) | 0.028          | 0.47(0.23-0.93) |
| <b>LRRK2 M2397T (0 or 1, 2)</b>     | 8/67 (12%)  | 0.100          | 0.44(0.20-0.95) |                |                 |
| <b>Type I Paneth cell phenotype</b> | 24/76 (32%) | 0.013          | 2.10(1.04-4.24) | 0.007          | 2.56(1.31-4.96) |

**Supplementary Table 3.** Association between known CD susceptible loci or genes known to affect Paneth cell function and Paneth cell defect in Japanese CD.

| CHR | Position (bp)* | dbSNP ID   | A <sub>1</sub> | A <sub>2</sub> | Risk for CD | Gene                                  | A1F   | Beta  | P values | Source |
|-----|----------------|------------|----------------|----------------|-------------|---------------------------------------|-------|-------|----------|--------|
| 1   | 63049593       | rs1748195  | G              | C              | G           | <i>USP1</i>                           | 28.6% | -1.60 | 7.69E-02 | (5)    |
| 1   | 67648596       | rs76418789 | A              | G              | G           | <i>IL23R</i>                          | 4.6%  | -0.77 | 6.86E-01 | (22)   |
| 1   | 120451190      | rs3897478  | C              | T              | T           | <i>ADAM3</i>                          | 2.0%  | -1.89 | 4.49E-01 | (3)    |
| 1   | 172862234      | rs9286879  | A              | G              | G           | <i>FASLG, TNFSF18</i>                 | 3.1%  | 0.20  | 9.39E-01 | (3)    |
| 1   | 186875459      | rs10798069 | T              | G              | G           | <i>PTGS2, PLA2G 4A</i>                | 43.2% | -1.05 | 2.72E-01 | (5)    |
| 2   | 27635463       | rs1728918  | A              | G              | A           | <i>UCN</i>                            | 25.5% | -0.55 | 5.44E-01 | (3)    |
| 2   | 62551472       | rs10865331 | A              | G              | A           |                                       | 30.1% | 0.77  | 4.25E-01 | (3)    |
| 2   | 234183368      | rs2241880  | G              | A              | G           | <i>ATG16L1</i>                        | 23.5% | 1.25  | 1.98E-01 | (27)   |
| 2   | 241570249      | rs3749172  | A              | C              | A           | <i>GPR35</i>                          | 30.1% | -1.54 | 9.96E-02 | (28)   |
| 2   | 242737341      | rs35320439 | C              | T              | C           | <i>PDCD1, ATG4B</i>                   | 38.3% | 0.60  | 4.74E-01 | (5)    |
| 3   | 57414434       | rs4462937  | G              | A              | A           | <i>DNAH12</i>                         | 39.2% | 1.52  | 8.31E-02 | (22)   |
| 3   | 141105570      | rs724016   | G              | A              | G           |                                       | 48.0% | 0.42  | 6.22E-01 | (5)    |
| 4   | 38335823       | rs1487630  | T              | C              | T           | <i>(4p14)</i>                         | 32.7% | 0.38  | 6.66E-01 | (21)   |
| 4   | 48363983       | rs6837335  | G              | A              | G           | <i>TXK, TEC, SLC1A4</i>               | 38.8% | 0.38  | 6.98E-01 | (3)    |
| 5   | 55438851       | rs10065637 | T              | C              | C           | <i>IL6ST, IL31RA</i>                  | 2.6%  | -2.96 | 2.85E-01 | (3)    |
| 5   | 72551134       | rs7702331  | G              | A              | A           |                                       | 15.8% | -0.83 | 4.45E-01 | (3)    |
| 5   | 173337853      | rs17695092 | G              | T              | T           | <i>CPEB4</i>                          | 8.7%  | 0.58  | 6.83E-01 | (3)    |
| 6   | 382559         | rs7773324  | A              | G              | A           | <i>IRF4, DUSP22</i>                   | 24.0% | 0.05  | 9.67E-01 | (5)    |
| 6   | 3420406        | rs13204048 | C              | T              | T           |                                       | 50.6% | -1.97 | 1.74E-02 | (5)    |
| 6   | 31274380       | rs9264942  | C              | T              | C           | <i>HLA-C, PSORS1C1, NFKBIL1, MICB</i> | 33.7% | -0.42 | 6.23E-01 | (3)    |
| 6   | 32370816       | rs28362680 | A              | G              | A           | <i>BTNL2</i>                          | 42.9% | -0.83 | 3.33E-01 | (22)   |
| 6   | 32373232       | rs10947261 | T              | G              | T           | <i>BTNL2</i>                          | 42.9% | -0.83 | 3.33E-01 | (28)   |
| 6   | 32713030       | rs3208181  | T              | C              | C           | <i>HLA-DQA2</i>                       | 19.4% | 0.62  | 5.78E-01 | (22)   |
| 6   | 33764033       | rs751728   | C              | T              | T           | <i>ITPR3, MIF1, IP6K3, LEMD2, MLN</i> | 21.9% | -0.89 | 3.36E-01 | (28)   |
| 6   | 127456122      | rs9491697  | A              | G              | G           |                                       | 50.5% | 0.76  | 3.79E-01 | (3)    |

|    |           |            |   |   |   |                                                  |       |       |          |      |
|----|-----------|------------|---|---|---|--------------------------------------------------|-------|-------|----------|------|
| 6  | 167371110 | rs2149085  | C | T | T | <i>RNASET2, FGFR1OP, CCR6, MIR3939</i>           | 45.4% | -0.46 | 6.14E-01 | (28) |
| 7  | 26892440  | rs10486483 | A | G | A |                                                  | 16.8% | -0.49 | 6.78E-01 | (3)  |
| 7  | 28180556  | rs864745   | C | T | T | <i>CREB5, JAZF1</i>                              | 18.9% | -2.48 | 1.12E-02 | (3)  |
| 8  | 90875918  | rs7015630  | C | T | T | <i>RIPK2</i>                                     | 21.1% | -1.29 | 2.42E-01 | (3)  |
| 8  | 129567181 | rs6651252  | C | T | T |                                                  | 2.0%  | -1.77 | 5.67E-01 | (3)  |
| 9  | 117568766 | rs6478109  | A | G | G | <i>TNFSF15</i>                                   | 27.0% | -0.31 | 7.27E-01 | (21) |
| 9  | 117665187 | rs3181374  | A | G | G | <i>TNFSF8</i>                                    | 41.3% | -0.58 | 4.78E-01 | (22) |
| 10 | 64477836  | rs224143   | A | G | G | <i>ZNF365</i>                                    | 38.8% | -0.13 | 8.95E-01 | (28) |
| 10 | 81045207  | rs1250569  | C | T | T | <i>ZMIZI</i>                                     | 39.4% | 0.34  | 7.00E-01 | (28) |
| 10 | 101295863 | rs888208   | G | A | A | <i>NKX2-3</i>                                    | 40.6% | 0.29  | 7.17E-01 | (22) |
| 10 | 112186148 | rs11195128 | T | C | T | <i>SMNDC1-DUSP5</i>                              | 25.5% | 0.24  | 8.02E-01 | (28) |
| 11 | 72533536  | rs11235604 | T | C | T | <i>ATG16L2</i>                                   | 13.8% | 2.00  | 1.06E-01 | (28) |
| 11 | 72863697  | rs11235667 | G | A | G | <i>ATG16L2-FCHSD2</i>                            | 14.3% | 1.76  | 1.51E-01 | (28) |
| 12 | 6491125   | rs7954567  | A | G | A | <i>CD27, TNFRSF1A, LTBR</i>                      | 4.1%  | 1.16  | 6.03E-01 | (5)  |
| 12 | 40758652  | rs3761863  | C | T | T | <i>LRRK2</i>                                     | 39.3% | 3.28  | 3.62E-04 | (29) |
| 13 | 41558110  | rs7329174  | G | A | G | <i>ELF1</i>                                      | 31.6% | 0.42  | 6.74E-01 | (21) |
| 13 | 43018030  | rs9525625  | C | T | T | <i>AKAP1, TFSF11</i>                             | 16.8% | -2.06 | 6.96E-02 | (5)  |
| 13 | 44457925  | rs3764147  | G | A | G | <i>LACCI</i>                                     | 37.8% | 0.47  | 6.05E-01 | (3)  |
| 14 | 35870798  | rs2273650  | T | C | C | <i>NFKBIA</i>                                    | 18.9% | -0.92 | 3.80E-01 | (22) |
| 15 | 38899190  | rs16967103 | C | T | C | <i>RASGRP1, SPRED1</i>                           | 6.1%  | -2.97 | 8.00E-02 | (3)  |
| 17 | 25843643  | rs2945412  | A | G | A | <i>LGALS9, NOS2</i>                              | 25.5% | -1.38 | 1.34E-01 | (3)  |
| 17 | 40466092  | rs1053004  | G | A | A | <i>STAT3</i>                                     | 35.9% | 2.04  | 3.81E-02 | (22) |
| 17 | 54880993  | rs3853824  | T | C | C |                                                  | 26.5% | -0.63 | 4.97E-01 | (5)  |
| 18 | 12854072  | rs514000   | C | T | C | <i>PTPN2</i>                                     | 38.8% | -1.17 | 1.74E-01 | (28) |
| 18 | 56879827  | rs9319943  | C | T | C |                                                  | 11.3% | 1.00  | 4.49E-01 | (5)  |
| 19 | 1124031   | rs2024092  | A | G | A | <i>GPX4, HMHA1</i>                               | 19.4% | 0.53  | 6.47E-01 | (3)  |
| 19 | 46849806  | rs4802307  | T | G | G |                                                  | 5.1%  | 2.17  | 2.81E-01 | (3)  |
| 21 | 16784706  | rs2823256  | A | G | G | <i>NRIP1, USP25</i>                              | 23.2% | -0.47 | 6.40E-01 | (28) |
| 21 | 34776695  | rs2284553  | A | G | G | <i>IFNGR2, IFNAR1, IFNA2, IL1RB, GART, TME5B</i> | 22.5% | -1.36 | 1.64E-01 | (3)  |
| 22 | 29145539  | rs5997391  | T | C | C | <i>XBPI</i>                                      | 13.3% | -2.31 | 5.29E-02 | (17) |

|    |          |          |   |   |   |                                              |       |      |          |     |
|----|----------|----------|---|---|---|----------------------------------------------|-------|------|----------|-----|
| 22 | 41867377 | rs727563 | C | T | C | <i>TEF, NHP2L1, PMM1,<br/>L3MBTL2, CHADL</i> | 38.7% | 0.38 | 7.22E-01 | (5) |
|----|----------|----------|---|---|---|----------------------------------------------|-------|------|----------|-----|

---

\*Positions are based on the Genome Reference Consortium human build 37 (GRCh37).

A1F: Allele 1 frequencies.

**Supplementary Table 4.** Candidate non-synonymous SNPs and genes associated with Paneth cell defect in Japanese CD by GWAS ( $P \leq 5 \times 10^{-4}$ ).

| dbSNP      | Chr | Position*<br>(bp) | Allele1/2 | MAF in<br>Japanese database | MAF in<br>our cohort | P-value               | Beta   | Gene           | Location   |
|------------|-----|-------------------|-----------|-----------------------------|----------------------|-----------------------|--------|----------------|------------|
| rs2296441  | 10  | 100144782         | C/T       | 40.9%                       | 41.5%                | $1.34 \times 10^{-5}$ | -4.046 | <i>PYROXD2</i> | Ala533Thr  |
| rs28364680 | 3   | 158520011         | C/T       | 17.3%                       | 14.8%                | $1.91 \times 10^{-5}$ | -4.799 | <i>MFSD1</i>   | Pro73Ser   |
| rs12224646 | 11  | 125708293         | T/G       | 21.4%                       | 19.4%                | $4.45 \times 10^{-5}$ | -4.23  | <i>PATE4</i>   | Cys90Gly   |
| rs3742076  | 12  | 2968169           | A/G       | 26.6%                       | 30.1%                | $1.42 \times 10^{-4}$ | -3.288 | <i>FOXMI</i>   | Ser627Pro  |
| rs4841399  | 8   | 10467124          | G/C       | 37.4%                       | 28.4%                | $1.49 \times 10^{-4}$ | -3.367 | <i>RPIL1</i>   | Pro1495Arg |
| rs3732675  | 3   | 12858028          | T/C       | 47.7%                       | 44.8%                | $2.44 \times 10^{-4}$ | -3.024 | <i>CAND2</i>   | Ser533Pro  |
| rs2282542  | 18  | 13056682          | G/A       | 25.4%                       | 23.0%                | $3.61 \times 10^{-4}$ | -3.671 | <i>CEP192</i>  | Val1365Met |

MAF: Minor allele (Allele 2) frequencies. \*Positions are based on the Genome Reference Consortium human build 37 (GRCh37).

**Supplementary Table 5.** Functional annotation clusters identified by DAVID.

| Category             | Term                                         | Count | %     | P Value  | Genes                                                                                                                                                                                                                                                                             | List Total | Pop Hits | Pop Total | Fold Enrichment | Bonferroni | Benjamini | FDR   |
|----------------------|----------------------------------------------|-------|-------|----------|-----------------------------------------------------------------------------------------------------------------------------------------------------------------------------------------------------------------------------------------------------------------------------------|------------|----------|-----------|-----------------|------------|-----------|-------|
| Annotation Cluster 1 | Enrichment Score: 3.5887324933722864         |       |       |          |                                                                                                                                                                                                                                                                                   |            |          |           |                 |            |           |       |
| GOTERM_MF_FAT        | GO:0008092~cytoskeletal protein binding      | 20    | 0.878 | 6.78E-05 | <i>PHACTR1, MYO1D, MYO3B, KATNB1, SYNPO2, ACTN2, PALLD, GAS7, CAPZB, GPR98, SYNPO2L, TNKS1BP1, FMN2, MYO18B, SORBS1, SORBS2, PAFAH1B1, SPTB, PARVA, SNTG2</i>                                                                                                                     | 180        | 504      | 12983     | 2.862           | 3.10E-02   | 3.10E-02  | 0.10  |
| GOTERM_MF_FAT        | GO:0003779~actin binding                     | 15    | 0.659 | 1.70E-04 | <i>PHACTR1, MYO1D, MYO3B, SYNPO2, ACTN2, PALLD, CAPZB, GAS7, SYNPO2L, FMN2, MYO18B, SORBS1, SPTB, PARVA, SNTG2</i>                                                                                                                                                                | 180        | 326      | 12983     | 3.319           | 7.60E-02   | 3.87E-02  | 0.24  |
| GOTERM_CC_FAT        | GO:0015629~actin cytoskeleton                | 14    | 0.615 | 2.03E-04 | <i>MYO1D, MYO3B, SYNPO2, ACTN2, PALLD, CAPZB, GAS7, CTNNA3, FMN2, MYO18B, SORBS1, SORBS2, CLIC5, SPTB</i>                                                                                                                                                                         | 192        | 269      | 12782     | 3.465           | 5.71E-02   | 5.71E-02  | 0.27  |
| SP_PIR_KEYWORD S     | actin-binding                                | 12    | 0.527 | 4.05E-04 | <i>PHACTR1, MYO18B, MYO3B, MYO1D, SYNPO2, ACTN2, PALLD, CAPZB, SYNPO2L, SPTB, PARVA, SNTG2</i>                                                                                                                                                                                    | 251        | 247      | 19235     | 3.723           | 1.12E-01   | 3.87E-02  | 0.54  |
| GOTERM_CC_FAT        | GO:0005856~cytoskeleton                      | 36    | 1.581 | 1.20E-03 | <i>SGCZ, KATNB1, CHEK1, CEP55, CAPZB, SYNPO2L, CDC45, SORBS1, SORBS2, PAFAH1B1, LRRFIP1, MYOF, DISC1, ANKS1B, CEP192, MYO1D, MYO3B, SYNPO2, ACTN2, PLEKHH1, PALLD, LRRC49, GAS7, GRM1, ARHGAP26, CTNNA3, FMN2, MYO18B, UACA, SEPT7P2, CLIC5, JAK2, SPTB, PARVA, SNTG2, KIF26B</i> | 192        | 1381     | 12782     | 1.735           | 2.95E-01   | 1.10E-01  | 1.59  |
| Annotation Cluster 2 | Enrichment Score: 2.937621133530258          |       |       |          |                                                                                                                                                                                                                                                                                   |            |          |           |                 |            |           |       |
| GOTERM_MF_FAT        | GO:0046983~protein dimerization activity     | 19    | 0.834 | 4.99E-04 | <i>JDP2, CADM1, KATNB1, DSCAML1, CREB5, ACTN2, ZBTB16, FOXP1, ABCG1, CDH13, CRYL1, SLC24A2, P2RX3, CHRNA7, PAFAH1B1, LRRK2, EXT1, PON3, ALX1</i>                                                                                                                                  | 180        | 542      | 12983     | 2.528           | 2.07E-01   | 7.45E-02  | 0.71  |
| GOTERM_MF_FAT        | GO:0042802~identical protein binding         | 20    | 0.878 | 1.34E-03 | <i>UPF2, CADM1, PFKFB3, CLDN5, DSCAML1, ACTN2, ZBTB16, ABCG1, FOXP1, ATXN1, CDH13, CRYL1, P2RX3, CMYA5, COLIA2, CHRNA7, PAFAH1B1, LRRK2, EXT1, PON3</i>                                                                                                                           | 180        | 640      | 12983     | 2.254           | 4.63E-01   | 1.44E-01  | 1.89  |
| GOTERM_MF_FAT        | GO:0042803~protein homodimerization activity | 13    | 0.571 | 2.30E-03 | <i>CDH13, CRYL1, CADM1, P2RX3, DSCAML1, PAFAH1B1, CHRNA7, ZBTB16, LRRK2, EXT1, ABCG1, FOXP1, PON3</i>                                                                                                                                                                             | 180        | 334      | 12983     | 2.807           | 6.58E-01   | 1.93E-01  | 3.23  |
| Annotation Cluster 3 | Enrichment Score: 2.4242046946842724         |       |       |          |                                                                                                                                                                                                                                                                                   |            |          |           |                 |            |           |       |
| GOTERM_BP_FAT        | GO:0007155~cell adhesion                     | 21    | 0.922 | 1.27E-03 | <i>CADM1, CLSTN2, CNTNAP5, NRXN3, COL22A1, CLSTN1, CLDN5, COL15A1, DSCAML1, CPXM2, SPOCK1, ACTN2, GPR98, CTNNA3, CDH13, COL14A1, COL6A6, SORBS1, TNR, PARVA, ALX1</i>                                                                                                             | 184        | 700      | 13528     | 2.206           | 8.50E-01   | 4.68E-01  | 2.09  |
| GOTERM_BP_FAT        | GO:0022610~biological adhesion               | 21    | 0.922 | 1.29E-03 | <i>CADM1, CLSTN2, CNTNAP5, NRXN3, COL22A1, CLSTN1, CLDN5, COL15A1, DSCAML1, CPXM2, SPOCK1, ACTN2, GPR98, CTNNA3, CDH13, COL14A1, COL6A6, SORBS1, TNR, PARVA, ALX1</i>                                                                                                             | 184        | 701      | 13528     | 2.203           | 8.54E-01   | 3.82E-01  | 2.13  |
| SP_PIR_KEYWORD S     | cell adhesion                                | 13    | 0.571 | 9.50E-03 | <i>CADM1, CLSTN2, CNTNAP5, NRXN3, CLSTN1, COL15A1, DSCAML1, CTNNA3, CDH13, COL14A1, COL6A6, TNR, PARVA</i>                                                                                                                                                                        | 251        | 422      | 19235     | 2.361           | 9.38E-01   | 2.07E-01  | 11.93 |



|                      |                                                         |    |       |          |                                                                                                                                                                                                                                                                                                                                                                                  |     |      |       |       |          |          |       |
|----------------------|---------------------------------------------------------|----|-------|----------|----------------------------------------------------------------------------------------------------------------------------------------------------------------------------------------------------------------------------------------------------------------------------------------------------------------------------------------------------------------------------------|-----|------|-------|-------|----------|----------|-------|
| GOTERM_BP_FAT        | GO:0016337~cell-cell adhesion                           | 10 | 0.439 | 1.29E-02 | <i>CDH13, COL14A1, CADMI, CLSTN2, CLSTN1, CLDN5, DSCAML1, GPR98, CTNNA3, ALX1</i>                                                                                                                                                                                                                                                                                                | 184 | 276  | 13528 | 2.664 | 1.00E+00 | 7.99E-01 | 19.33 |
| Annotation Cluster 4 | Enrichment Score: 2.349548248314411                     |    |       |          |                                                                                                                                                                                                                                                                                                                                                                                  |     |      |       |       |          |          |       |
| GOTERM_CC_FAT        | GO:0015629~actin cytoskeleton                           | 14 | 0.615 | 2.03E-04 | <i>MYO1D, MYO3B, SYNPO2, ACTN2, PALLD, CAPZB, GAS7, CTNNA3, FMN2, MYO18B, SORBS1, SORBS2, CLIC5, SPTB</i>                                                                                                                                                                                                                                                                        | 192 | 269  | 12782 | 3.465 | 5.71E-02 | 5.71E-02 | 0.27  |
| SP_PIR_KEYWORD S     | cytoskeleton                                            | 20 | 0.878 | 6.86E-04 | <i>SGCZ, CEP192, MYO3B, KATNB1, CHEK1, CEP55, PALLD, CAPZB, LRRC49, ARHGAP26, CTNNA3, SYNPO2L, UACA, SORBS1, CLIC5, PAFAH1B1, DISC1, SPTB, PARVA, SNTG2</i>                                                                                                                                                                                                                      | 251 | 636  | 19235 | 2.410 | 1.81E-01 | 4.88E-02 | 0.91  |
| GOTERM_CC_FAT        | GO:0005856~cytoskeleton                                 | 36 | 1.581 | 1.20E-03 | <i>SGCZ, KATNB1, CHEK1, CEP55, CAPZB, SYNPO2L, CDC45, SORBS1, SORBS2, PAFAH1B1, LRRFIP1, MYOF, DISC1, ANKS1B, CEP192, MYO1D, MYO3B, SYNPO2, ACTN2, PLEKHH1, PALLD, LRRC49, GAS7, GRM1, ARHGAP26, CTNNA3, FMN2, MYO18B, UACA, SEPT7P2, CLIC5, JAK2, SPTB, PARVA, SNTG2, KIF26B</i>                                                                                                | 192 | 1381 | 12782 | 1.735 | 2.95E-01 | 1.10E-01 | 1.59  |
| GOTERM_CC_FAT        | GO:0044430~cytoskeletal part                            | 23 | 1.010 | 2.71E-02 | <i>ANKS1B, CEP192, MYO1D, MYO3B, KATNB1, CHEK1, ACTN2, CEP55, PALLD, GAS7, GRM1, CAPZB, LRRC49, CDC45, MYO18B, SORBS1, SEPT7P2, CLIC5, PAFAH1B1, MYOF, DISC1, SPTB, KIF26B</i>                                                                                                                                                                                                   | 192 | 952  | 12782 | 1.608 | 1.00E+00 | 3.92E-01 | 30.55 |
| GOTERM_CC_FAT        | GO:0043228~non-membrane-bounded organelle               | 50 | 2.196 | 4.20E-02 | <i>BTD, HIRA, SYNPO2L, TOP1, CDC45, SEH1L, LRRFIP1, DISC1, ALX1, NOL6, ANKS1B, MYO3B, TRPA1, ACTN2, PLEKHH1, PALLD, GRM1, CTNNA3, ARHGAP26, FMN2, MYO18B, NAV2, CLIC5, SPTB, KIF26B, PARVA, SNTG2, SGCZ, KATNB1, AHCTF1, CHEK1, CEP55, ZBTB16, CAPZB, SORBS1, SORBS2, PAFAH1B1, MYOF, CEP192, MYO1D, SYNPO2, CPS1, GAS7, LRRC49, FOXP1, ATXN1, TNKS1BP1, UACA, SEPT7P2, JAK2</i> | 192 | 2596 | 12782 | 1.282 | 1.00E+00 | 4.32E-01 | 43.51 |
| GOTERM_CC_FAT        | GO:0043232~intracellular non-membrane-bounded organelle | 50 | 2.196 | 4.20E-02 | <i>BTD, HIRA, SYNPO2L, TOP1, CDC45, SEH1L, LRRFIP1, DISC1, ALX1, NOL6, ANKS1B, MYO3B, TRPA1, ACTN2, PLEKHH1, PALLD, GRM1, CTNNA3, ARHGAP26, FMN2, MYO18B, NAV2, CLIC5, SPTB, KIF26B, PARVA, SNTG2, SGCZ, KATNB1, AHCTF1, CHEK1, CEP55, ZBTB16, CAPZB, SORBS1, SORBS2, PAFAH1B1, MYOF, CEP192, MYO1D, SYNPO2, CPS1, GAS7, LRRC49, FOXP1, ATXN1, TNKS1BP1, UACA, SEPT7P2, JAK2</i> | 192 | 2596 | 12782 | 1.282 | 1.00E+00 | 4.32E-01 | 43.51 |
| Annotation Cluster 5 | Enrichment Score: 1.808780874062325                     |    |       |          |                                                                                                                                                                                                                                                                                                                                                                                  |     |      |       |       |          |          |       |
| GOTERM_CC_FAT        | GO:0045202~synapse                                      | 14 | 0.615 | 2.63E-03 | <i>PHACTR1, ANKS1B, CADMI, CLSTN2, RIMBP2, CLSTN1, GRM1, GRM8, GRM7, OTOF, CHRNA7, ERC1, LRRK2, GAP43</i>                                                                                                                                                                                                                                                                        | 192 | 355  | 12782 | 2.625 | 5.34E-01 | 1.42E-01 | 3.44  |
| SP_PIR_KEYWORD S     | cell junction                                           | 12 | 0.527 | 1.57E-02 | <i>NOX4, ANKS1B, PHACTR1, SORBS1, OTOF, CLSTN1, RIMBP2, CLDN5, CHRNA7, GAP43, ARHGAP26, PARVA</i>                                                                                                                                                                                                                                                                                | 251 | 399  | 19235 | 2.305 | 9.90E-01 | 2.81E-01 | 18.99 |
| GOTERM_CC_FAT        | GO:0030054~cell junction                                | 15 | 0.659 | 2.35E-02 | <i>NOX4, PHACTR1, ANKS1B, CADMI, CLDN5, RIMBP2, CLSTN1, ACTN2, ARHGAP26, CTNNA3, SORBS1, OTOF, CHRNA7, GAP43, PARVA</i>                                                                                                                                                                                                                                                          | 192 | 518  | 12782 | 1.928 | 9.99E-01 | 3.69E-01 | 27.12 |
| SP_PIR_KEYWORD S     | synapse                                                 | 7  | 0.307 | 6.00E-02 | <i>ANKS1B, PHACTR1, OTOF, CLSTN1, RIMBP2, CHRNA7, GAP43</i>                                                                                                                                                                                                                                                                                                                      | 251 | 213  | 19235 | 2.518 | 1.00E+00 | 5.44E-01 | 56.08 |

|                      |                                                                  |    |       |          |                                                                                                                                               |     |     |       |       |          |          |       |  |
|----------------------|------------------------------------------------------------------|----|-------|----------|-----------------------------------------------------------------------------------------------------------------------------------------------|-----|-----|-------|-------|----------|----------|-------|--|
| Annotation Cluster 6 | Enrichment Score: 1.7852952536854563                             |    |       |          |                                                                                                                                               |     |     |       |       |          |          |       |  |
| GOTERM_CC_FAT        | GO:0045202~synapse                                               | 14 | 0.615 | 2.63E-03 | <i>PHACTRI, ANKS1B, CADM1, CLSTN2, RIMBP2, CLSTN1, GRM1, GRM8, GRM7, OTOF, CHRNA7, ERC1, LRRK2, GAP43</i>                                     | 192 | 355 | 12782 | 2.625 | 5.34E-01 | 1.42E-01 | 3.44  |  |
| GOTERM_CC_FAT        | GO:0044456~synapse part                                          | 10 | 0.439 | 1.17E-02 | <i>ANKS1B, CADM1, CLSTN2, GRM8, GRM7, CLSTN1, CHRNA7, ERC1, LRRK2, GRM1</i>                                                                   | 192 | 246 | 12782 | 2.706 | 9.67E-01 | 3.47E-01 | 14.45 |  |
| GOTERM_CC_FAT        | GO:0045211~postsynaptic membrane                                 | 5  | 0.220 | 1.44E-01 | <i>ANKS1B, CLSTN2, GRM7, CLSTN1, CHRNA7</i>                                                                                                   | 192 | 135 | 12782 | 2.466 | 1.00E+00 | 6.94E-01 | 87.28 |  |
| Annotation Cluster 7 | Enrichment Score: 1.747108846856024                              |    |       |          |                                                                                                                                               |     |     |       |       |          |          |       |  |
| GOTERM_CC_FAT        | GO:0043005~neuron projection                                     | 13 | 0.571 | 5.33E-03 | <i>ANKS1B, CDH13, CADM1, GRM8, TACR1, GRM7, P2RX3, KATNB1, PAFAH1B1, ACTN2, LRRK2, GRM1, GAP43</i>                                            | 192 | 342 | 12782 | 2.531 | 7.88E-01 | 2.28E-01 | 6.86  |  |
| GOTERM_CC_FAT        | GO:0042995~cell projection                                       | 19 | 0.834 | 1.67E-02 | <i>ANKS1B, CADM1, TACR1, CLSTN1, KATNB1, ACTN2, CAPZB, GRM1, GAS7, CTNNA3, CDH13, GRM8, CLIC5, P2RX3, GRM7, PAFAH1B1, LRRK2, GAP43, PARVA</i> | 192 | 697 | 12782 | 1.815 | 9.92E-01 | 3.34E-01 | 20.03 |  |
| GOTERM_CC_FAT        | GO:0030424~axon                                                  | 7  | 0.307 | 3.21E-02 | <i>CADM1, GRM7, P2RX3, KATNB1, LRRK2, GRM1, GAP43</i>                                                                                         | 192 | 159 | 12782 | 2.931 | 1.00E+00 | 4.27E-01 | 35.23 |  |
| GOTERM_CC_FAT        | GO:0030425~dendrite                                              | 7  | 0.307 | 3.60E-02 | <i>ANKS1B, CADM1, TACR1, GRM7, ACTN2, LRRK2, GRM1</i>                                                                                         | 192 | 163 | 12782 | 2.859 | 1.00E+00 | 4.12E-01 | 38.55 |  |
| Annotation Cluster 8 | Enrichment Score: 1.7084036327548526                             |    |       |          |                                                                                                                                               |     |     |       |       |          |          |       |  |
| GOTERM_BP_FAT        | GO:0030030~cell projection organization                          | 14 | 0.615 | 1.51E-03 | <i>PRKCA, NRXN3, DSCAML1, ACTN2, CAPZB, GAS7, GPR98, CDH13, TNR, CLIC5, PAFAH1B1, JAK2, UNC5C, GAP43</i>                                      | 184 | 368 | 13528 | 2.797 | 8.94E-01 | 3.61E-01 | 2.47  |  |
| GOTERM_BP_FAT        | GO:0048667~cell morphogenesis involved in neuron differentiation | 9  | 0.395 | 7.59E-03 | <i>PRKCA, NRXN3, TNR, CLIC5, DSCAML1, PAFAH1B1, JAK2, UNC5C, GAP43</i>                                                                        | 184 | 209 | 13528 | 3.166 | 1.00E+00 | 8.02E-01 | 11.88 |  |
| GOTERM_BP_FAT        | GO:0048812~neuron projection morphogenesis                       | 9  | 0.395 | 8.46E-03 | <i>PRKCA, NRXN3, TNR, DSCAML1, PAFAH1B1, JAK2, UNC5C, GAS7, GAP43</i>                                                                         | 184 | 213 | 13528 | 3.107 | 1.00E+00 | 7.94E-01 | 13.16 |  |
| GOTERM_BP_FAT        | GO:000902~cell morphogenesis                                     | 12 | 0.527 | 9.16E-03 | <i>PRKCA, NOX4, NRXN3, TNR, CLIC5, DSCAML1, PAFAH1B1, JAK2, UNC5C, UPK3A, GAS7, GAP43</i>                                                     | 184 | 356 | 13528 | 2.478 | 1.00E+00 | 7.82E-01 | 14.16 |  |
| GOTERM_BP_FAT        | GO:0007409~axonogenesis                                          | 8  | 0.351 | 1.60E-02 | <i>PRKCA, NRXN3, TNR, DSCAML1, PAFAH1B1, JAK2, UNC5C, GAP43</i>                                                                               | 184 | 193 | 13528 | 3.048 | 1.00E+00 | 7.77E-01 | 23.52 |  |
| GOTERM_BP_FAT        | GO:0048666~neuron development                                    | 11 | 0.483 | 1.71E-02 | <i>PRKCA, NRXN3, TNR, CLIC5, DSCAML1, PAFAH1B1, JAK2, UNC5C, GAS7, GAP43, GPR98</i>                                                           | 184 | 339 | 13528 | 2.386 | 1.00E+00 | 7.78E-01 | 24.85 |  |
| GOTERM_BP_FAT        | GO:0000904~cell morphogenesis involved in differentiation        | 9  | 0.395 | 1.80E-02 | <i>PRKCA, NRXN3, TNR, CLIC5, DSCAML1, PAFAH1B1, JAK2, UNC5C, GAP43</i>                                                                        | 184 | 244 | 13528 | 2.712 | 1.00E+00 | 7.58E-01 | 25.98 |  |
| GOTERM_BP_FAT        | GO:0048858~cell projection morphogenesis                         | 9  | 0.395 | 1.84E-02 | <i>PRKCA, NRXN3, TNR, DSCAML1, PAFAH1B1, JAK2, UNC5C, GAS7, GAP43</i>                                                                         | 184 | 245 | 13528 | 2.701 | 1.00E+00 | 7.48E-01 | 26.50 |  |
| GOTERM_BP_FAT        | GO:0032989~cellular component morphogenesis                      | 12 | 0.527 | 1.93E-02 | <i>PRKCA, NOX4, NRXN3, TNR, CLIC5, DSCAML1, PAFAH1B1, JAK2, UNC5C, UPK3A, GAS7, GAP43</i>                                                     | 184 | 397 | 13528 | 2.222 | 1.00E+00 | 7.48E-01 | 27.59 |  |
| GOTERM_BP_FAT        | GO:0031175~neuron projection development                         | 9  | 0.395 | 2.32E-02 | <i>PRKCA, NRXN3, TNR, DSCAML1, PAFAH1B1, JAK2, UNC5C, GAS7, GAP43</i>                                                                         | 184 | 256 | 13528 | 2.585 | 1.00E+00 | 7.82E-01 | 32.32 |  |
| GOTERM_BP_FAT        | GO:0032990~cell morphogenesis part                               | 9  | 0.395 | 2.32E-02 | <i>PRKCA, NRXN3, TNR, DSCAML1, PAFAH1B1, JAK2, UNC5C, GAS7, GAP43</i>                                                                         | 184 | 256 | 13528 | 2.585 | 1.00E+00 | 7.82E-01 | 32.32 |  |
| GOTERM_BP_FAT        | GO:0030182~neuron differentiation                                | 11 | 0.483 | 7.41E-02 | <i>PRKCA, NRXN3, TNR, CLIC5, DSCAML1, PAFAH1B1, JAK2, UNC5C, GAS7, GAP43, GPR98</i>                                                           | 184 | 438 | 13528 | 1.846 | 1.00E+00 | 9.39E-01 | 72.16 |  |
| GOTERM_BP_FAT        | GO:0006928~cell motion                                           | 11 | 0.483 | 1.11E-01 | <i>PRKCA, CDH13, NRXN3, TNR, ATP1A4, PAFAH1B1, SPOCK1, JAK2, UNC5C, CAPZB, GAP43</i>                                                          | 184 | 475 | 13528 | 1.703 | 1.00E+00 | 9.41E-01 | 85.82 |  |

|                       |                                                           |    |       |          |                                                                                                                                                                                |     |      |       |        |          |          |       |
|-----------------------|-----------------------------------------------------------|----|-------|----------|--------------------------------------------------------------------------------------------------------------------------------------------------------------------------------|-----|------|-------|--------|----------|----------|-------|
| GOTERM_BP_FAT         | GO:0007411~axon guidance                                  | 4  | 0.176 | 1.77E-01 | <i>NRXN3, TNR, UNC5C, GAP43</i>                                                                                                                                                | 184 | 107  | 13528 | 2.748  | 1.00E+00 | 9.40E-01 | 96.03 |
| Annotation Cluster 9  | Enrichment Score: 1.5406287959155505                      |    |       |          |                                                                                                                                                                                |     |      |       |        |          |          |       |
| INTERPRO              | IPR000162:GPCR, family 3, metabotropic glutamate receptor | 3  | 0.132 | 4.70E-03 | <i>GRM8, GRM7, GRM1</i>                                                                                                                                                        | 223 | 8    | 16659 | 28.014 | 9.22E-01 | 7.21E-01 | 6.63  |
| GOTERM_CC_FAT         | GO:0042734~presynaptic membrane                           | 4  | 0.176 | 9.02E-03 | <i>GRM8, GRM7, ERC1, GRM1</i>                                                                                                                                                  | 192 | 29   | 12782 | 9.182  | 9.28E-01 | 3.13E-01 | 11.35 |
| INTERPRO              | IPR011500:GPCR, family 3, nine cysteines region           | 3  | 0.132 | 1.45E-02 | <i>GRM8, GRM7, GRM1</i>                                                                                                                                                        | 223 | 14   | 16659 | 16.008 | 1.00E+00 | 8.62E-01 | 19.14 |
| INTERPRO              | IPR000337:GPCR, family 3                                  | 3  | 0.132 | 1.88E-02 | <i>GRM8, GRM7, GRM1</i>                                                                                                                                                        | 223 | 16   | 16659 | 14.007 | 1.00E+00 | 8.72E-01 | 24.11 |
| INTERPRO              | IPR017979:GPCR, family 3, conserved site                  | 3  | 0.132 | 3.43E-02 | <i>GRM8, GRM7, GRM1</i>                                                                                                                                                        | 223 | 22   | 16659 | 10.187 | 1.00E+00 | 9.57E-01 | 39.84 |
| INTERPRO              | IPR017978:GPCR, family 3, C-terminal                      | 3  | 0.132 | 4.03E-02 | <i>GRM8, GRM7, GRM1</i>                                                                                                                                                        | 223 | 24   | 16659 | 9.338  | 1.00E+00 | 9.39E-01 | 45.04 |
| GOTERM_MF_FAT         | GO:0008066~glutamate receptor activity                    | 3  | 0.132 | 6.77E-02 | <i>GRM8, GRM7, GRM1</i>                                                                                                                                                        | 180 | 31   | 12983 | 6.980  | 1.00E+00 | 8.70E-01 | 63.20 |
| INTERPRO              | IPR001828:Extracellular ligand-binding receptor           | 3  | 0.132 | 8.29E-02 | <i>GRM8, GRM7, GRM1</i>                                                                                                                                                        | 223 | 36   | 16659 | 6.225  | 1.00E+00 | 9.73E-01 | 71.65 |
| KEGG_PATHWAY          | hsa04080:Neuroactive ligand-receptor interaction          | 7  | 0.307 | 1.53E-01 | <i>ADORA3, GRM8, TACR1, GRM7, P2RX3, GRM1, ADRA1D</i>                                                                                                                          | 73  | 256  | 5085  | 1.905  | 1.00E+00 | 8.10E-01 | 83.55 |
| Annotation Cluster 10 | Enrichment Score: 1.5317650008320958                      |    |       |          |                                                                                                                                                                                |     |      |       |        |          |          |       |
| GOTERM_CC_FAT         | GO:0005626~insoluble fraction                             | 22 | 0.966 | 1.39E-02 | <i>PRKCA, SLC13A5, CADM1, SPHK2, SLC22A8, ACSBG2, MME, TSPAN9, GRM1, POR, STT3A, ACSL1, UACA, CLIC5, SLC24A2, IGF2R, OTOF, JAK2, PAFAH1B1, LRRK2, PON3, ATP8B3</i>             | 192 | 839  | 12782 | 1.746  | 9.83E-01 | 3.63E-01 | 16.97 |
| GOTERM_CC_FAT         | GO:0005624~membrane fraction                              | 20 | 0.878 | 3.36E-02 | <i>PRKCA, CADM1, SPHK2, SLC22A8, ACSBG2, MME, TSPAN9, GRM1, POR, STT3A, ACSL1, UACA, SLC24A2, IGF2R, OTOF, JAK2, PAFAH1B1, LRRK2, PON3, ATP8B3</i>                             | 192 | 809  | 12782 | 1.646  | 1.00E+00 | 4.07E-01 | 36.53 |
| GOTERM_CC_FAT         | GO:0000267~cell fraction                                  | 24 | 1.054 | 5.44E-02 | <i>PRKCA, SLC13A5, CADM1, SPHK2, BTC, SLC22A8, ACSBG2, MME, TSPAN9, GRM1, POR, FBLN1, STT3A, ACSL1, UACA, CLIC5, SLC24A2, IGF2R, OTOF, JAK2, PAFAH1B1, LRRK2, PON3, ATP8B3</i> | 192 | 1083 | 12782 | 1.475  | 1.00E+00 | 4.91E-01 | 52.45 |
| Annotation Cluster 11 | Enrichment Score: 1.521405906636893                       |    |       |          |                                                                                                                                                                                |     |      |       |        |          |          |       |
| INTERPRO              | IPR008160:Collagen triple helix repeat                    | 7  | 0.307 | 8.96E-04 | <i>COL4A4, COL14A1, COL6A6, COL22A1, COL1A2, COL15A1, WDR33</i>                                                                                                                | 223 | 84   | 16659 | 6.225  | 3.85E-01 | 3.85E-01 | 1.30  |
| GOTERM_CC_FAT         | GO:0005578~proteinaceous extracellular matrix             | 14 | 0.615 | 1.05E-03 | <i>COL4A4, ADAMTS17, LTBP1, SPOCK3, COL22A1, COL15A1, SPOCK1, FBLN1, COL14A1, COL6A6, NAV2, TNR, GPC6, COL1A2</i>                                                              | 192 | 320  | 12782 | 2.913  | 2.62E-01 | 1.41E-01 | 1.38  |
| SP_PIR_KEYWORD S      | extracellular matrix                                      | 11 | 0.483 | 1.26E-03 | <i>COL4A4, ADAMTS17, FBLN1, COL14A1, COL6A6, SPOCK3, TNR, COL22A1, COL1A2, COL15A1, SPOCK1</i>                                                                                 | 251 | 241  | 19235 | 3.498  | 3.09E-01 | 5.13E-02 | 1.67  |
| SP_PIR_KEYWORD S      | collagen                                                  | 7  | 0.307 | 1.50E-03 | <i>COL4A4, COL14A1, COL6A6, COL22A1, COL1A2, COL15A1, WDR33</i>                                                                                                                | 251 | 95   | 19235 | 5.647  | 3.56E-01 | 5.35E-02 | 1.98  |
| GOTERM_CC_FAT         | GO:0031012~extracellular matrix                           | 14 | 0.615 | 2.04E-03 | <i>COL4A4, ADAMTS17, LTBP1, SPOCK3, COL22A1, COL15A1, SPOCK1, FBLN1, COL14A1, COL6A6, NAV2, TNR, GPC6, COL1A2</i>                                                              | 192 | 345  | 12782 | 2.702  | 4.47E-01 | 1.38E-01 | 2.68  |
| SP_PIR_KEYWORD S      | hydroxylation                                             | 6  | 0.264 | 2.31E-03 | <i>COL4A4, LTBP1, COL14A1, COL6A6, COL1A2, COL15A1</i>                                                                                                                         | 251 | 71   | 19235 | 6.476  | 4.91E-01 | 7.23E-02 | 3.03  |

|                       |                                                        |    |       |          |                                                                                                                                                                                                                                                                      |     |      |       |        |          |          |        |
|-----------------------|--------------------------------------------------------|----|-------|----------|----------------------------------------------------------------------------------------------------------------------------------------------------------------------------------------------------------------------------------------------------------------------|-----|------|-------|--------|----------|----------|--------|
| GOTERM_CC_FAT         | GO:0005581~collagen                                    | 4  | 0.176 | 1.51E-02 | <i>COL4A4, COL14A1, COL1A2, COL15A1</i>                                                                                                                                                                                                                              | 192 | 35   | 12782 | 7.608  | 9.88E-01 | 3.57E-01 | 18.35  |
| GOTERM_MF_FAT         | GO:0005201~extracellular matrix structural constituent | 5  | 0.220 | 3.10E-02 | <i>COL4A4, FBLN1, COL14A1, COL1A2, COL15A1</i>                                                                                                                                                                                                                       | 180 | 86   | 12983 | 4.193  | 1.00E+00 | 8.03E-01 | 36.14  |
| INTERPRO              | IPR003129:Laminin G, N-terminal                        | 3  | 0.132 | 3.43E-02 | <i>COL14A1, COL22A1, COL15A1</i>                                                                                                                                                                                                                                     | 223 | 22   | 16659 | 10.187 | 1.00E+00 | 9.57E-01 | 39.84  |
| UP_SEQ_FEATURE        | domain:TSP N-terminal                                  | 3  | 0.132 | 3.60E-02 | <i>COL14A1, COL22A1, COL15A1</i>                                                                                                                                                                                                                                     | 251 | 23   | 19113 | 9.932  | 1.00E+00 | 9.62E-01 | 44.24  |
| SMART                 | SM00210:TSPN                                           | 3  | 0.132 | 4.34E-02 | <i>COL14A1, COL22A1, COL15A1</i>                                                                                                                                                                                                                                     | 139 | 22   | 9079  | 8.907  | 9.98E-01 | 9.98E-01 | 40.67  |
| SP_PIR_KEYWORD        | trimer                                                 | 3  | 0.132 | 4.46E-02 | <i>COL4A4, COL14A1, COL1A2</i>                                                                                                                                                                                                                                       | 251 | 26   | 19235 | 8.842  | 1.00E+00 | 4.54E-01 | 45.48  |
| SP_PIR_KEYWORD        | hydroxylysine                                          | 3  | 0.132 | 6.11E-02 | <i>COL4A4, COL14A1, COL1A2</i>                                                                                                                                                                                                                                       | 251 | 31   | 19235 | 7.416  | 1.00E+00 | 5.36E-01 | 56.81  |
| SP_PIR_KEYWORD        | triple helix                                           | 3  | 0.132 | 6.11E-02 | <i>COL4A4, COL14A1, COL1A2</i>                                                                                                                                                                                                                                       | 251 | 31   | 19235 | 7.416  | 1.00E+00 | 5.36E-01 | 56.81  |
| GOTERM_CC_FAT         | GO:0044421~extracellular region part                   | 21 | 0.922 | 8.16E-02 | <i>COL4A4, ADAMTS17, LTBP1, SPOCK3, BTC, COL22A1, COL15A1, SPOCK1, CCL26, CDH13, FBLN1, COL14A1, COL6A6, SFRP1, NAV2, GPC6, TNR, SULF1, COL1A2, PON3, COL4A4, COL14A1, COL1A2</i>                                                                                    | 192 | 960  | 12782 | 1.456  | 1.00E+00 | 5.86E-01 | 67.75  |
| SP_PIR_KEYWORD        | hydroxyproline                                         | 3  | 0.132 | 8.33E-02 | <i>COL4A4, COL14A1, COL1A2</i>                                                                                                                                                                                                                                       | 251 | 37   | 19235 | 6.214  | 1.00E+00 | 6.23E-01 | 68.57  |
| INTERPRO              | IPR002035: von Willebrand factor, type A               | 4  | 0.176 | 8.86E-02 | <i>COL14A1, COL6A6, COL22A1, CACNA2D3</i>                                                                                                                                                                                                                            | 223 | 79   | 16659 | 3.782  | 1.00E+00 | 9.73E-01 | 74.11  |
| UP_SEQ_FEATURE        | short sequence motif: Cell attachment site             | 4  | 0.176 | 1.08E-01 | <i>COL4A4, LTBP1, COL14A1, COL6A6</i>                                                                                                                                                                                                                                | 251 | 88   | 19113 | 3.461  | 1.00E+00 | 9.87E-01 | 83.95  |
| KEGG_PATHWAY          | hsa04512:ECM-receptor interaction                      | 4  | 0.176 | 1.15E-01 | <i>COL4A4, COL6A6, TNR, COL1A2</i>                                                                                                                                                                                                                                   | 73  | 84   | 5085  | 3.317  | 1.00E+00 | 7.94E-01 | 73.68  |
| SMART                 | SM00327:VWA                                            | 4  | 0.176 | 1.19E-01 | <i>COL14A1, COL6A6, COL22A1, CACNA2D3</i>                                                                                                                                                                                                                            | 139 | 79   | 9079  | 3.307  | 1.00E+00 | 9.15E-01 | 77.32  |
| GOTERM_CC_FAT         | GO:0044420~extracellular matrix part                   | 4  | 0.176 | 2.55E-01 | <i>COL4A4, COL14A1, COL1A2, COL15A1</i>                                                                                                                                                                                                                              | 192 | 117  | 12782 | 2.276  | 1.00E+00 | 8.25E-01 | 97.99  |
| GOTERM_MF_FAT         | GO:0005198~structural molecule activity                | 12 | 0.527 | 2.59E-01 | <i>COL4A4, CLTA, FBLN1, COL14A1, SORBS2, COL22A1, CLDN5, COL1A2, COL15A1, ACTN2, CTNNA3, SPTB</i>                                                                                                                                                                    | 180 | 634  | 12983 | 1.365  | 1.00E+00 | 9.49E-01 | 98.61  |
| SP_PIR_KEYWORD        | Secreted                                               | 26 | 1.142 | 2.77E-01 | <i>ADAMTS17, LTBP1, BTDP, SPOCK3, BTC, SPOCK1, CCL26, COL6A6, GPC6, TNR, DEFBI, COL4A4, TUB, PATE1, COL22A1, COL15A1, CPXM2, FBLN1, COL14A1, SFRP1, COL1A2, MUC19, PATE2, CHGB, PON3, PATE4</i>                                                                      | 251 | 1689 | 19235 | 1.180  | 1.00E+00 | 8.43E-01 | 98.65  |
| GOTERM_CC_FAT         | GO:0005576~extracellular region                        | 31 | 1.361 | 5.34E-01 | <i>ADAMTS17, LTBP1, BTDP, SPOCK3, BTC, SPOCK1, CCL26, COL6A6, TNR, GPC6, DEFBI, COL4A4, PATE1, COL22A1, COL15A1, CPXM2, ACTN2, CDH13, FBLN1, UACA, COL14A1, SFRP1, NAV2, SULF1, COL1A2, MUC19, CHGB, SSC5D, PATE2, PON3, PATE4</i>                                   | 192 | 2010 | 12782 | 1.027  | 1.00E+00 | 9.33E-01 | 100.00 |
| Annotation Cluster 12 | Enrichment Score: 1.4274713832542512                   |    |       |          |                                                                                                                                                                                                                                                                      |     |      |       |        |          |          |        |
| GOTERM_CC_FAT         | GO:0044459~plasma membrane part                        | 46 | 2.020 | 1.52E-02 | <i>SGCZ, CLTA, ADORA3, SLC13A5, CADMI, TACR1, CLSTN1, CLDN5, MME, TSPAN9, IL17RA, ACBD3, SORBS1, GPC6, CHRNA7, GNG2, GOLM1, RHOH, NOX4, ANKS1B, PHACTR1, NRXN3, SLC22A8, RIMBP2, TRPA1, ATP1A4, ACTN2, UPK3A, GRM1, ABCG1, ARHGAP26, CTNNA3, CDH13, RAB31, GRM8,</i> | 192 | 2203 | 12782 | 1.390  | 9.88E-01 | 3.31E-01 | 18.37  |

|                     |                            |    |       |          |                                                                                                                                                                                                                                                                                                                                                                                                                                                                                        |     |      |       |       |          |          |       |
|---------------------|----------------------------|----|-------|----------|----------------------------------------------------------------------------------------------------------------------------------------------------------------------------------------------------------------------------------------------------------------------------------------------------------------------------------------------------------------------------------------------------------------------------------------------------------------------------------------|-----|------|-------|-------|----------|----------|-------|
| SP_PIR_KEYWORD<br>S | cell membrane              | 40 | 1.757 | 2.65E-02 | <i>IGF2R, OTOF, GRM7, P2RX3, JAK2, ADRA1D, GAP43, PLA2G4E, SPTB, PARVA, SNTG2</i>                                                                                                                                                                                                                                                                                                                                                                                                      | 251 | 2194 | 19235 | 1.397 | 1.00E+00 | 3.24E-01 | 30.02 |
| GOTERM_CC_FAT       | GO:0005886~plasma membrane | 65 | 2.855 | 1.30E-01 | <i>SGCZ, ADORA3, CADM1, CLSTN2, TACR1, CLSTN1, OR1J1, CLDN5, BTC, OR4K17, MME, STOML3, MREG, LPHN3, SORBS1, GPC6, CHRNA7, GNG2, MYOF, RHOH, PRKCA, NOX4, GPR97, TUB, ANKS1B, SLC22A8, RIMBP2, GRM1, GPR98, CDH13, RAB31, GRM8, OTOF, GRM7, ANXA13, TREML2, GAP43, ADRA1D, PARVA, SNTG2</i>                                                                                                                                                                                             | 192 | 3777 | 12782 | 1.146 | 1.00E+00 | 6.75E-01 | 84.33 |
|                     |                            |    |       |          | <i>FHIT, CLTA, ADCY1, ADORA3, SLC13A5, CLSTN2, CADM1, TACR1, CLSTN1, CLDN5, OR1J1, BTC, OR4K17, STOML3, TSPAN9, IL17RA, ACBD3, LPHN3, GPC6, GNG2, CHRNA7, GOLM1, RHOH, PRKCA, GPR97, ANKS1B, NRXN3, SLC22A8, TRPA1, RIMBP2, ACTN2, GRM1, ARHGAP26, CTNNA3, GPR98, GRM8, IGF2R, OTOF, GRM7, COL1A2, LRRK2, GAP43, SPTB, SNTG2, PARVA, SGCZ, MME, ZBTB16, MREG, ACSL1, SORBS1, MYOF, NOX4, PHACTR1, ATP1A4, UPK3A, ABCG1, CDH13, RAB31, P2RX3, ANXA13, JAK2, TREML2, ADRA1D, PLA2G4E</i> |     |      |       |       |          |          |       |

**Supplementary Table 6.** Protein-protein interaction (PPI) network for the top 288 annotated genes.

| node1  | node2    | node1_string_id | node2_string_id | node1_external_id | node2_external_id | neighborhood | fusion | cooccurrence | homology | coexpression | experimental | knowledge | textmining | combined score |
|--------|----------|-----------------|-----------------|-------------------|-------------------|--------------|--------|--------------|----------|--------------|--------------|-----------|------------|----------------|
| EXT1   | ANXA13   | 1856833         | 1845095         | ENSP00000367446   | ENSP00000262219   | 0            | 0      | 0            | 0        | 0            | 0            | 0         | 0.744      | 0.744          |
| RAB39A | UACA     | 1850467         | 1849718         | ENSP00000322594   | ENSP00000314556   | 0            | 0      | 0            | 0        | 0            | 0            | 0         | 0.956      | 0.957          |
| PDE7B  | LINGO2   | 1849328         | 1849261         | ENSP00000310661   | ENSP00000310126   | 0            | 0      | 0            | 0        | 0            | 0.203        | 0         | 0.412      | 0.511          |
| ADRA1D | PLCB4    | 1857034         | 1851676         | ENSP00000368766   | ENSP00000334105   | 0            | 0      | 0            | 0        | 0            | 0.08         | 0.9       | 0          | 0.904          |
| ESRRG  | MED1     | 1859115         | 1848202         | ENSP00000386171   | ENSP00000300651   | 0            | 0      | 0            | 0        | 0            | 0            | 0.9       | 0.191      | 0.915          |
| CEP192 | PAFAH1B1 | 1861712         | 1858470         | ENSP00000427550   | ENSP00000380378   | 0            | 0      | 0            | 0        | 0            | 0            | 0.9       | 0          | 0.9            |
| ARNTL  | MED1     | 1857849         | 1848202         | ENSP00000374357   | ENSP00000300651   | 0            | 0      | 0            | 0        | 0            | 0            | 0.9       | 0.24       | 0.92           |
| CDC45  | CEP55    | 1860553         | 1855493         | ENSP00000405726   | ENSP00000360540   | 0            | 0      | 0            | 0        | 0.112        | 0.359        | 0         | 0.213      | 0.512          |
| P2RX3  | TRPA1    | 1845329         | 1845090         | ENSP00000263314   | ENSP00000262209   | 0            | 0      | 0            | 0        | 0            | 0            | 0         | 0.662      | 0.662          |
| OR4K17 | OR1J1    | 1850124         | 1844685         | ENSP00000319197   | ENSP00000259357   | 0            | 0      | 0            | 0.882    | 0            | 0            | 0.9       | 0          | 0.9            |
| STT3A  | PUS3     | 1858037         | 1843115         | ENSP00000376472   | ENSP00000227474   | 0            | 0      | 0            | 0        | 0            | 0            | 0         | 0.483      | 0.483          |
| ADRA1D | GRM1     | 1857034         | 1846816         | ENSP00000368766   | ENSP00000282753   | 0            | 0      | 0            | 0        | 0            | 0            | 0.9       | 0.089      | 0.905          |
| CHEK2  | FOXM1    | 1857546         | 1852579         | ENSP00000372023   | ENSP00000342307   | 0            | 0      | 0            | 0        | 0.072        | 0.576        | 0         | 0.858      | 0.939          |
| DISC1  | ACTN2    | 1854415         | 1854402         | ENSP00000355593   | ENSP00000355537   | 0            | 0      | 0            | 0        | 0            | 0.484        | 0         | 0.311      | 0.629          |
| CHEK2  | KPNA3    | 1857546         | 1844961         | ENSP00000372023   | ENSP00000261667   | 0            | 0      | 0            | 0        | 0.065        | 0.293        | 0         | 0.414      | 0.578          |
| PRKCA  | JAK2     | 1860737         | 1857411         | ENSP00000408695   | ENSP00000371067   | 0            | 0      | 0            | 0.617    | 0            | 0.101        | 0.9       | 0.289      | 0.915          |
| GAS7   | MOB2     | 1860671         | 1851066         | ENSP00000407552   | ENSP00000328694   | 0            | 0      | 0            | 0        | 0            | 0.332        | 0         | 0.141      | 0.401          |
| CCDC39 | LRRC49   | 1860550         | 1844783         | ENSP00000405708   | ENSP00000260382   | 0            | 0      | 0            | 0        | 0            | 0            | 0         | 0.404      | 0.404          |
| CHEK2  | TOP1     | 1857546         | 1854138         | ENSP00000372023   | ENSP00000354522   | 0            | 0      | 0            | 0        | 0            | 0            | 0         | 0.684      | 0.684          |
| ATP1A4 | PLCB4    | 1854723         | 1851676         | ENSP00000357060   | ENSP00000334105   | 0            | 0      | 0            | 0        | 0            | 0            | 0         | 0.706      | 0.706          |
| PATE4  | PATE1    | 1860919         | 1848925         | ENSP00000411439   | ENSP00000307164   | 0            | 0      | 0            | 0        | 0            | 0            | 0         | 0.413      | 0.412          |
| CPS1   | CWC27    | 1860357         | 1857330         | ENSP00000402608   | ENSP00000370460   | 0            | 0      | 0            | 0        | 0.078        | 0.285        | 0         | 0.182      | 0.413          |
| CSMD1  | SGCZ     | 1862182         | 1857476         | ENSP00000441462   | ENSP00000371512   | 0            | 0      | 0            | 0        | 0            | 0            | 0         | 0.5        | 0.499          |



|          |         |         |         |                 |                 |   |   |   |       |       |       |     |       |       |
|----------|---------|---------|---------|-----------------|-----------------|---|---|---|-------|-------|-------|-----|-------|-------|
| ADORA3   | ADCY1   | 1855085 | 1847854 | ENSP00000358730 | ENSP00000297323 | 0 | 0 | 0 | 0     | 0     | 0     | 0.9 | 0.043 | 0.9   |
| PRKCA    | PLA2G4E | 1860737 | 1858733 | ENSP00000408695 | ENSP00000382434 | 0 | 0 | 0 | 0     | 0     | 0.087 | 0.8 | 0     | 0.809 |
| CPS1     | JAK2    | 1860357 | 1857411 | ENSP00000402608 | ENSP00000371067 | 0 | 0 | 0 | 0     | 0     | 0.101 | 0   | 0.399 | 0.436 |
| GRM7     | GRM1    | 1853578 | 1846816 | ENSP00000350348 | ENSP00000282753 | 0 | 0 | 0 | 0.902 | 0     | 0     | 0.9 | 0.886 | 0.908 |
| CES1     | COL14A1 | 1854024 | 1847909 | ENSP00000353720 | ENSP00000297848 | 0 | 0 | 0 | 0     | 0     | 0     | 0   | 0.472 | 0.472 |
| PRKCA    | GRM7    | 1860737 | 1853578 | ENSP00000408695 | ENSP00000350348 | 0 | 0 | 0 | 0     | 0     | 0.576 | 0   | 0.312 | 0.695 |
| GAS7     | MYO18B  | 1860671 | 1851736 | ENSP00000407552 | ENSP00000334563 | 0 | 0 | 0 | 0     | 0     | 0.406 | 0   | 0.617 | 0.763 |
| SPTB     | CTNNA3  | 1857851 | 1855980 | ENSP00000374372 | ENSP00000362849 | 0 | 0 | 0 | 0     | 0     | 0.102 | 0   | 0.487 | 0.52  |
| ATP8B3   | MS4A14  | 1849407 | 1848159 | ENSP00000311336 | ENSP00000300187 | 0 | 0 | 0 | 0     | 0     | 0     | 0   | 0.501 | 0.501 |
| KATNB1   | HIATL1  | 1857071 | 1856280 | ENSP00000368982 | ENSP00000364493 | 0 | 0 | 0 | 0     | 0     | 0     | 0   | 0.486 | 0.485 |
| CDH13    | CADM1   | 1860733 | 1859861 | ENSP00000408632 | ENSP00000395359 | 0 | 0 | 0 | 0     | 0     | 0     | 0   | 0.458 | 0.457 |
| DNAJC6   | SRBD1   | 1858290 | 1845406 | ENSP00000378735 | ENSP00000263736 | 0 | 0 | 0 | 0     | 0.495 | 0     | 0   | 0     | 0.495 |
| ADORA3   | GNG2    | 1855085 | 1851723 | ENSP00000358730 | ENSP00000334448 | 0 | 0 | 0 | 0     | 0     | 0     | 0.9 | 0.071 | 0.903 |
| JAK2     | SPHK2   | 1857411 | 1843751 | ENSP00000371067 | ENSP00000245222 | 0 | 0 | 0 | 0     | 0     | 0     | 0.9 | 0.116 | 0.907 |
| PRKCA    | CHEK1   | 1860737 | 1859362 | ENSP00000408695 | ENSP00000388648 | 0 | 0 | 0 | 0.656 | 0     | 0.17  | 0.9 | 0.181 | 0.917 |
| PLCB4    | TACR1   | 1851676 | 1848544 | ENSP00000334105 | ENSP00000303522 | 0 | 0 | 0 | 0     | 0     | 0     | 0.9 | 0.12  | 0.908 |
| SLC35F2  | SLC25A1 | 1859730 | 1842516 | ENSP00000393571 | ENSP00000215882 | 0 | 0 | 0 | 0     | 0     | 0     | 0   | 0.431 | 0.431 |
| JAK2     | DAB2IP  | 1857411 | 1844688 | ENSP00000371067 | ENSP00000259371 | 0 | 0 | 0 | 0     | 0     | 0     | 0   | 0.809 | 0.809 |
| EXT1     | GPC6    | 1856833 | 1856600 | ENSP00000367446 | ENSP00000366246 | 0 | 0 | 0 | 0     | 0     | 0     | 0.9 | 0.541 | 0.952 |
| ACTN2    | MYO18B  | 1854402 | 1851736 | ENSP00000355537 | ENSP00000334563 | 0 | 0 | 0 | 0     | 0.07  | 0.153 | 0   | 0.369 | 0.459 |
| FBLN1    | TNR     | 1851357 | 1845363 | ENSP00000331544 | ENSP00000263525 | 0 | 0 | 0 | 0     | 0     | 0     | 0   | 0.608 | 0.608 |
| PLA2G4E  | MBOAT1  | 1858733 | 1850697 | ENSP00000382434 | ENSP00000324944 | 0 | 0 | 0 | 0     | 0     | 0.149 | 0.9 | 0.089 | 0.915 |
| PAFAH1B1 | DISC1   | 1858470 | 1854415 | ENSP00000380378 | ENSP00000355593 | 0 | 0 | 0 | 0     | 0     | 0.306 | 0   | 0.564 | 0.684 |
| PRKCA    | RHOH    | 1860737 | 1857435 | ENSP00000408695 | ENSP00000371219 | 0 | 0 | 0 | 0     | 0     | 0.302 | 0   | 0.444 | 0.595 |
| GRM7     | ADCY1   | 1853578 | 1847854 | ENSP00000350348 | ENSP00000297323 | 0 | 0 | 0 | 0     | 0     | 0     | 0.9 | 0.106 | 0.906 |



|          |          |         |         |                 |                 |       |   |   |       |       |       |     |       |       |
|----------|----------|---------|---------|-----------------|-----------------|-------|---|---|-------|-------|-------|-----|-------|-------|
| CACNA2D3 | ATP11A   | 1861397 | 1846860 | ENSP00000419101 | ENSP00000283558 | 0     | 0 | 0 | 0     | 0     | 0     | 0   | 0.419 | 0.419 |
| MED1     | ACSL1    | 1848202 | 1846727 | ENSP00000300651 | ENSP00000281455 | 0     | 0 | 0 | 0     | 0     | 0     | 0.9 | 0     | 0.9   |
| COL22A1  | COL14A1  | 1848499 | 1847909 | ENSP00000303153 | ENSP00000297848 | 0     | 0 | 0 | 0.63  | 0     | 0     | 0.9 | 0.234 | 0.907 |
| PALLD    | ACTN2    | 1861658 | 1854402 | ENSP00000425556 | ENSP00000355537 | 0     | 0 | 0 | 0     | 0     | 0.576 | 0   | 0     | 0.576 |
| CDK12    | CREB5    | 1860122 | 1853582 | ENSP00000398880 | ENSP00000350359 | 0     | 0 | 0 | 0     | 0     | 0.572 | 0   | 0     | 0.572 |
| FAM155A  | FAM189A1 | 1856404 | 1844878 | ENSP00000365080 | ENSP00000261275 | 0     | 0 | 0 | 0     | 0     | 0     | 0   | 0.544 | 0.544 |
| CTNNA3   | ACTN2    | 1855980 | 1854402 | ENSP00000362849 | ENSP00000355537 | 0     | 0 | 0 | 0     | 0     | 0.102 | 0.8 | 0.757 | 0.952 |
| KCNK10   | TRPA1    | 1849312 | 1845090 | ENSP00000310568 | ENSP00000262209 | 0     | 0 | 0 | 0     | 0     | 0     | 0   | 0.416 | 0.416 |
| COL1A2   | MITF     | 1847845 | 1847592 | ENSP00000297268 | ENSP00000295600 | 0     | 0 | 0 | 0     | 0     | 0     | 0   | 0.495 | 0.495 |
| LTBP1    | ADORA3   | 1859086 | 1855085 | ENSP00000386043 | ENSP00000358730 | 0     | 0 | 0 | 0     | 0     | 0     | 0   | 0.609 | 0.609 |
| PATE4    | PATE2    | 1860919 | 1853698 | ENSP00000411439 | ENSP00000351325 | 0     | 0 | 0 | 0     | 0     | 0     | 0   | 0.725 | 0.725 |
| COL4A4   | COL22A1  | 1858410 | 1848499 | ENSP00000379866 | ENSP00000303153 | 0     | 0 | 0 | 0.611 | 0     | 0     | 0.9 | 0.139 | 0.903 |
| PRKCA    | ADCY1    | 1860737 | 1847854 | ENSP00000408695 | ENSP00000297323 | 0     | 0 | 0 | 0     | 0     | 0.15  | 0   | 0.427 | 0.492 |
| PALLD    | SORBS2   | 1861658 | 1846926 | ENSP00000425556 | ENSP00000284776 | 0     | 0 | 0 | 0     | 0     | 0.576 | 0   | 0     | 0.576 |
| MYO3B    | MYO18B   | 1859134 | 1851736 | ENSP00000386213 | ENSP00000334563 | 0     | 0 | 0 | 0.622 | 0.289 | 0     | 0   | 0.657 | 0.461 |
| PDE7B    | LRRK2    | 1849328 | 1848005 | ENSP00000310661 | ENSP00000298910 | 0     | 0 | 0 | 0     | 0     | 0.311 | 0   | 0.206 | 0.429 |
| JAK2     | TUB      | 1857411 | 1848730 | ENSP00000371067 | ENSP00000305426 | 0     | 0 | 0 | 0     | 0     | 0.57  | 0   | 0.083 | 0.588 |
| CSMD1    | SLC35F2  | 1862182 | 1859730 | ENSP00000441462 | ENSP00000393571 | 0     | 0 | 0 | 0     | 0     | 0     | 0   | 0.526 | 0.526 |
| PRKCA    | GNG2     | 1860737 | 1851723 | ENSP00000408695 | ENSP00000334448 | 0     | 0 | 0 | 0     | 0     | 0     | 0.9 | 0.062 | 0.902 |
| CDC45    | CHEK2    | 1860553 | 1857546 | ENSP00000405726 | ENSP00000372023 | 0     | 0 | 0 | 0     | 0.288 | 0.211 | 0   | 0.727 | 0.833 |
| CDC45    | TOP1     | 1860553 | 1854138 | ENSP00000405726 | ENSP00000354522 | 0     | 0 | 0 | 0     | 0     | 0.506 | 0   | 0.632 | 0.81  |
| CRYL1    | ACSBG2   | 1847940 | 1844148 | ENSP00000298248 | ENSP00000252669 | 0.282 | 0 | 0 | 0     | 0     | 0     | 0   | 0.201 | 0.401 |
| BCL11A   | FOXP1    | 1852138 | 1850093 | ENSP00000338774 | ENSP00000318902 | 0     | 0 | 0 | 0     | 0     | 0.102 | 0   | 0.363 | 0.404 |
| GRM7     | GRM8     | 1853578 | 1852779 | ENSP00000350348 | ENSP00000344173 | 0     | 0 | 0 | 0.983 | 0     | 0     | 0.9 | 0.871 | 0.901 |
| DNAJC6   | CLTA     | 1858290 | 1843621 | ENSP00000378735 | ENSP00000242285 | 0     | 0 | 0 | 0     | 0     | 0.575 | 0   | 0.873 | 0.944 |







**Supplementary Table 7.** Potential pathways associated with Paneth cell defect in Japanese CD.

| Term                                                      | Number of genes | <i>P</i> value        | <i>P</i> value (FDR)  |
|-----------------------------------------------------------|-----------------|-----------------------|-----------------------|
| Protein digestion and absorption                          | 7               | $1.10 \times 10^{-4}$ | $3.14 \times 10^{-2}$ |
| Glutamatergic synapse                                     | 7               | $5.48 \times 10^{-4}$ | $7.86 \times 10^{-2}$ |
| Calcium signaling pathway                                 | 8               | $1.99 \times 10^{-3}$ | $1.91 \times 10^{-1}$ |
| Cholinergic synapse                                       | 6               | $2.71 \times 10^{-3}$ | $1.95 \times 10^{-1}$ |
| Long-term depression                                      | 4               | $6.75 \times 10^{-3}$ | $3.38 \times 10^{-1}$ |
| Inflammatory mediator regulation of TRP channels          | 5               | $7.56 \times 10^{-3}$ | $3.38 \times 10^{-1}$ |
| Retrograde endocannabinoid signaling                      | 5               | $8.25 \times 10^{-3}$ | $3.38 \times 10^{-1}$ |
| Amoebiasis                                                | 5               | $1.14 \times 10^{-2}$ | $4.10 \times 10^{-1}$ |
| Leukocyte transendothelial migration                      | 5               | $1.59 \times 10^{-2}$ | $4.73 \times 10^{-1}$ |
| Focal adhesion                                            | 7               | $1.65 \times 10^{-2}$ | $4.73 \times 10^{-1}$ |
| Endocrine and other factor-regulated calcium reabsorption | 3               | $2.17 \times 10^{-2}$ | $5.05 \times 10^{-1}$ |
| Dopaminergic synapse                                      | 5               | $2.28 \times 10^{-2}$ | $5.05 \times 10^{-1}$ |
| Neuroactive ligand-receptor interaction                   | 8               | $2.44 \times 10^{-2}$ | $5.05 \times 10^{-1}$ |
| ECM-receptor interaction                                  | 4               | $2.46 \times 10^{-2}$ | $5.05 \times 10^{-1}$ |
| Adrenergic signaling in cardiomyocytes                    | 5               | $3.67 \times 10^{-2}$ | $7.03 \times 10^{-1}$ |
| VEGF signaling pathway                                    | 3               | $4.11 \times 10^{-2}$ | $7.37 \times 10^{-1}$ |

# Supplementary Figure 1

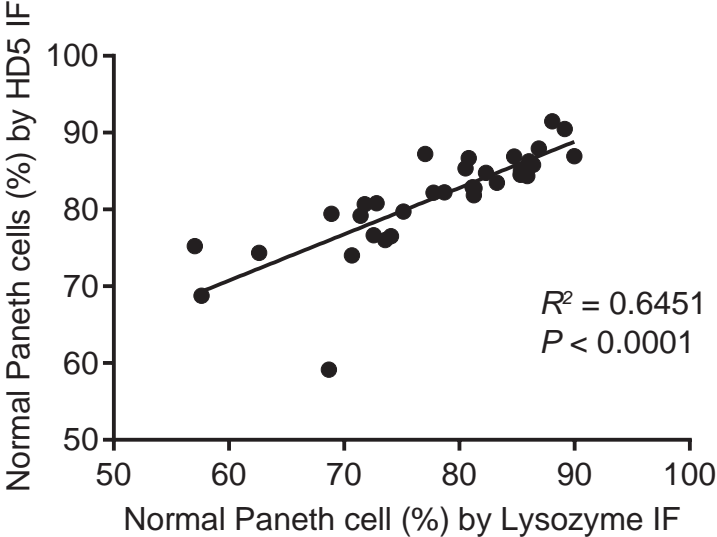

## Supplementary Figure 2

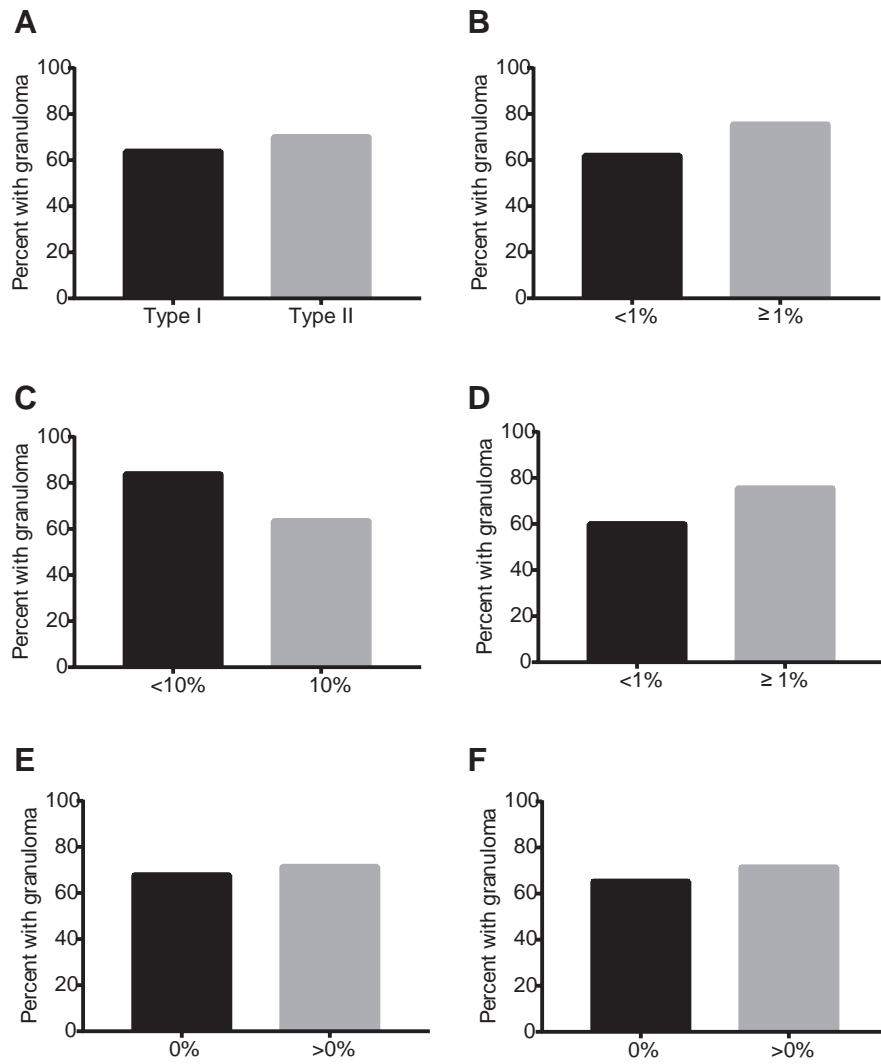

# Supplementary Figure 3

**A**

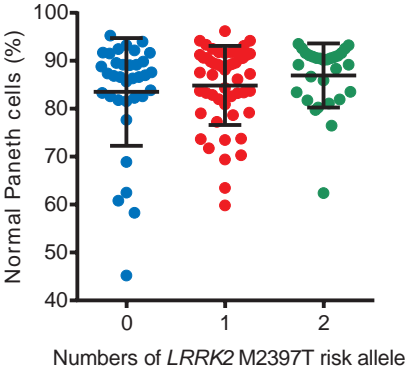

**B**

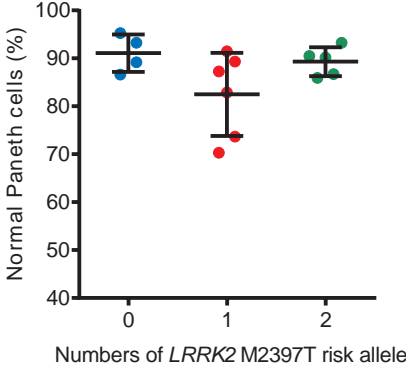



Supplementary Figure 4

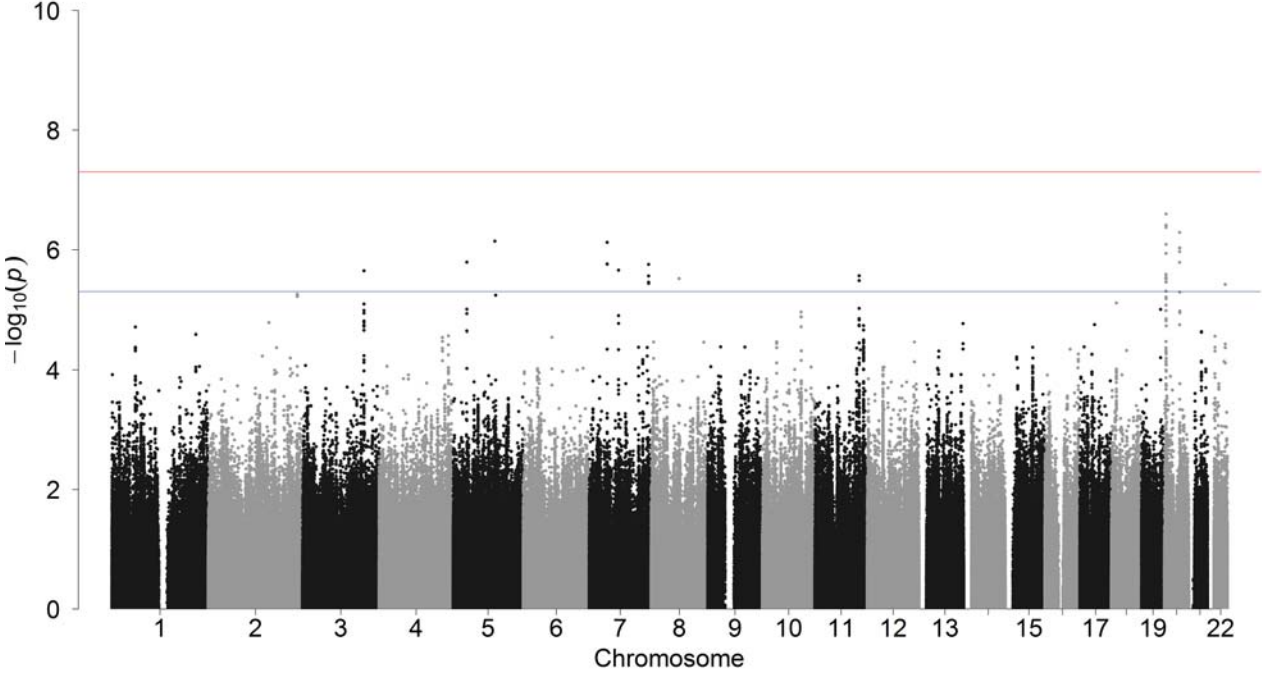

Supplementary Figure 5

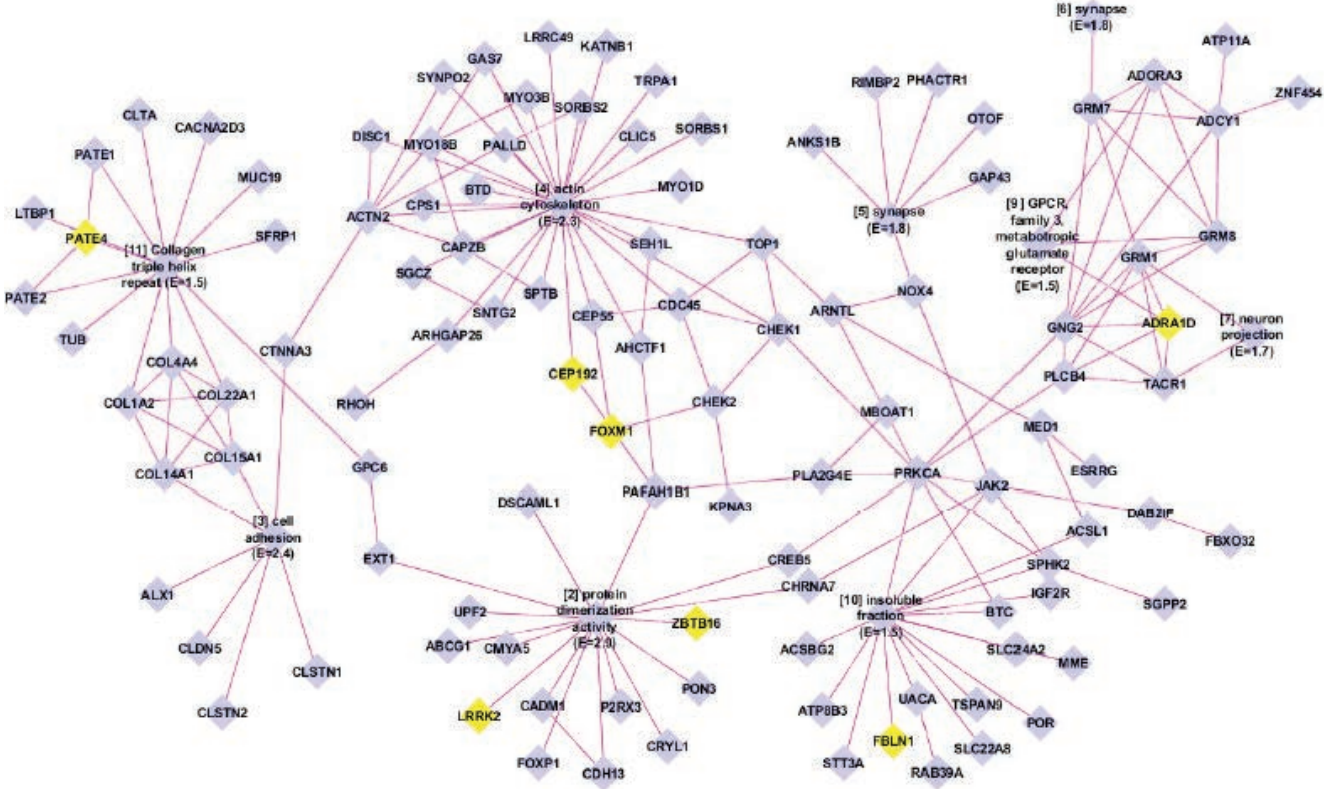

**Supplementary Figure legend:**

**Supplementary Figure 1.** Determination of percentage of normal Paneth cells obtained by Defensin-5 (HD5) immunofluorescence strongly correlated with that obtained by lysozyme immunofluorescence. A series of 33 Japanese Crohn's disease cases were co-stained with both HD5 and lysozyme immunofluorescence ( $R^2 = 0.6451$ ;  $P < 0.0001$  by linear regression).

**Supplementary Figure 2.** Correlation of Paneth cell phenotype and presence of granuloma in the Japanese Crohn's disease cohort. No significant difference was seen when the presence of granuloma was correlated with (A) Type I vs. Type II Paneth cell phenotype ( $P = 0.6469$ ); (B) Percentage of disordered (D1) Paneth cells ( $P = 0.1249$ ); (C) Percentage of diminished (D2) Paneth cells ( $P = 0.0506$ ); (D) Percentage of diffuse (D3) Paneth cells ( $P = 0.0992$ ); (E) Percentage of excluded (D4) Paneth cells ( $P = 0.7152$ ); (F) Percentage of enlarged (D5) Paneth cells ( $P = 0.5396$ ). Statistical analysis was performed using Fisher's exact test.

**Supplementary Figure 3.** The numbers of *LRRK2* M2397T allele did not correlate with the percentage of normal Paneth cells in North American Crohn's disease (CD) patients with (A) either *ATG16L1* T300A or *NOD2* risk alleles ( $R^2 = 0.01998$  and  $P = 0.13$  by linear regression) or (B) no risk alleles for *ATG16L1* T300A or *NOD2* ( $R^2 = 0.003903$  and  $P = 0.82$  by linear regression). Error bars represent  $\pm$  SEM.

**Supplementary Figure 4.** Manhattan plot for 4,198,245 SNPs from the genome-wide association analysis for Paneth cell phenotype. Single nucleotide polymorphisms are plotted according to chromosomal location, with the  $-\log_{10}(P)$  calculated by the linear regression test. The red line

indicates the threshold for the genome-wide significance ( $P = 5 \times 10^{-8}$ ). The blue line indicates the threshold for the nominal significance ( $P = 5 \times 10^{-6}$ ).

**Supplementary Figure 5.** Network annotation of pathway analysis. Genes associated with the candidate single nucleotide polymorphisms are highlighted in yellow.
